# Supplementary material
Source: PubMed Central journal article supplement (PMC6790007)
Supplement: NIHMS1053907-supplement-Supplemental.pdf [file NIHMS1053907-supplement-Supplemental.pdf]

30°C

37°C

BY4741/pYES2

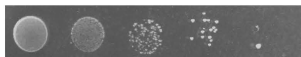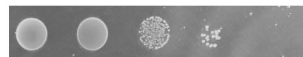 $\Delta$ Scsit4/pYES2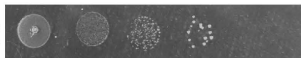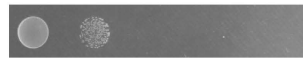 $\Delta$ Scsit4/MoPPE1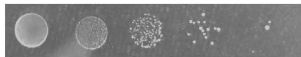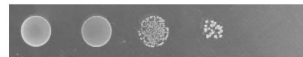

30°C

37°C

BY4741/pYES2

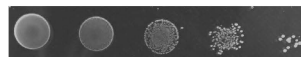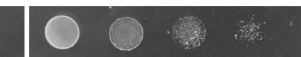 $\Delta$ Scgln3/pYES2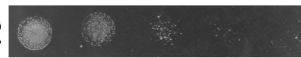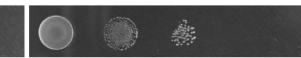 $\Delta$ Scgln3/MoNUT1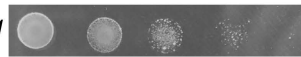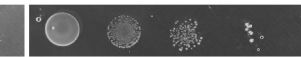

SD

SD+H<sub>2</sub>O<sub>2</sub>

BY4741/pYES2

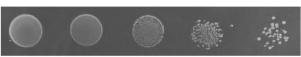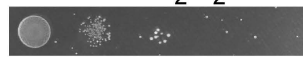 $\Delta$ Scsap4/pYES2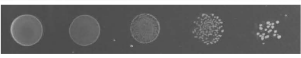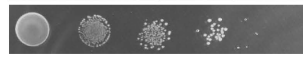 $\Delta$ Scsap4/MoSAP1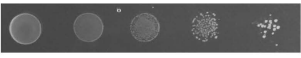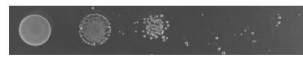

SD

SD+ Hygromycin B

BY4741/pYES2

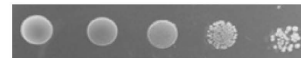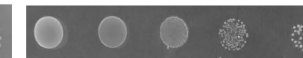 $\Delta$ Scsap155/pYES2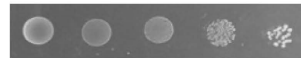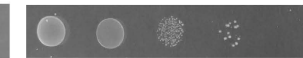 $\Delta$ Scsap155/MoSAP1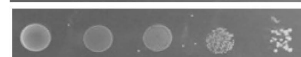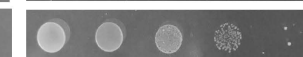

SD

SD+ Hygromycin B

BY4741/pYES2

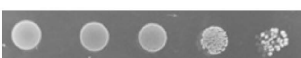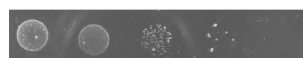 $\Delta$ Scsap185/pYES2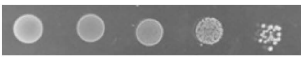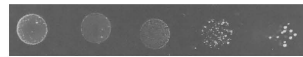 $\Delta$ Scsap185/MoSAP1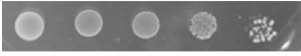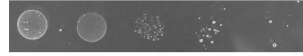

SD

SD+ Tunimycin

BY4741/pYES2

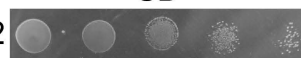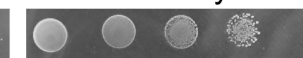 $\Delta$ Scsap190/pYES2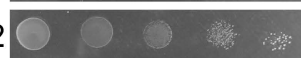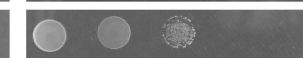 $\Delta$ Scsap190/MoSAP1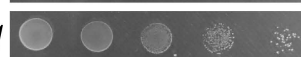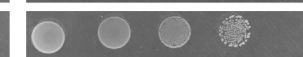

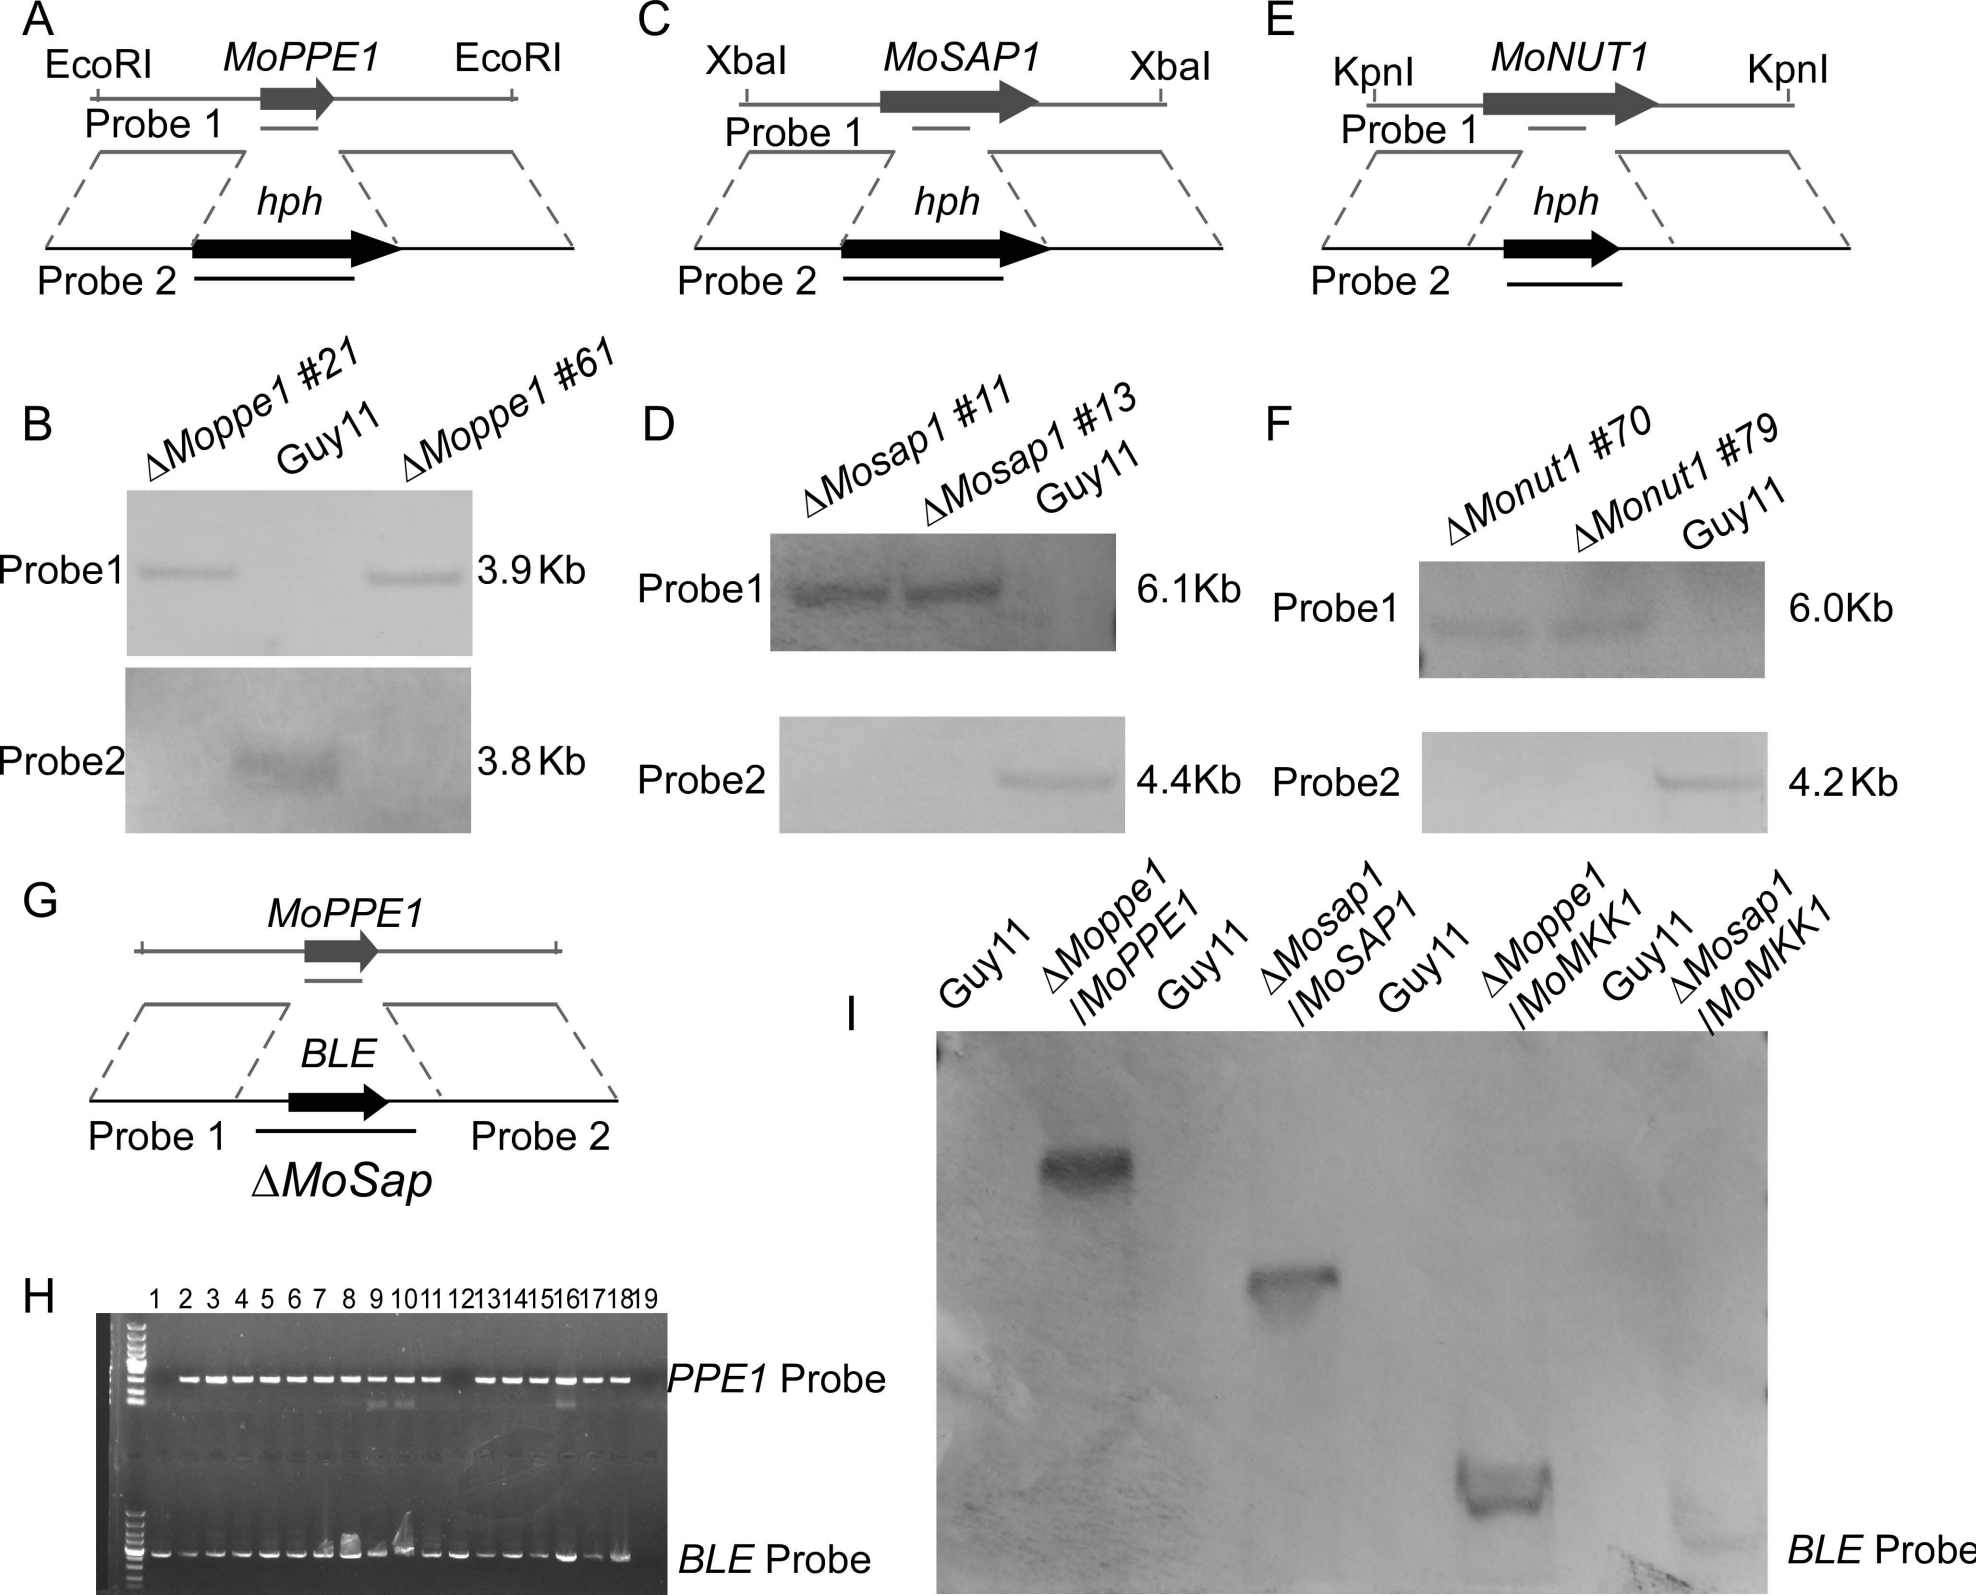

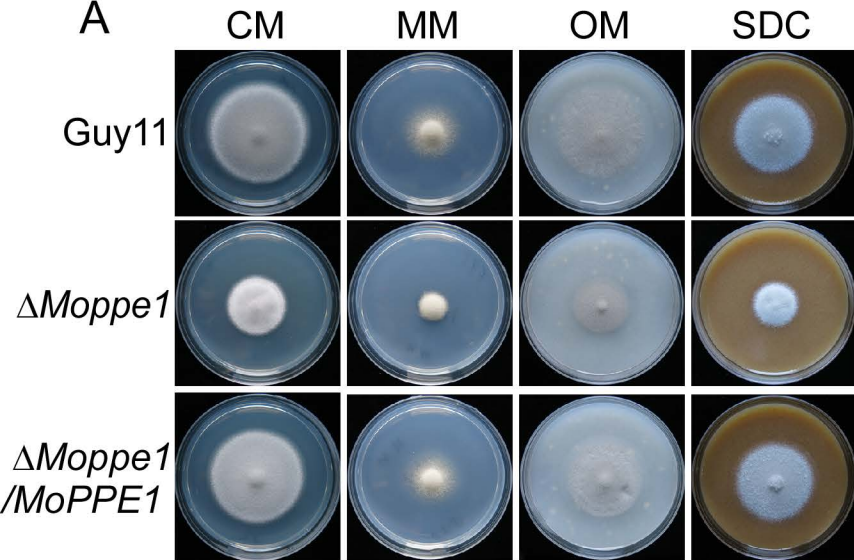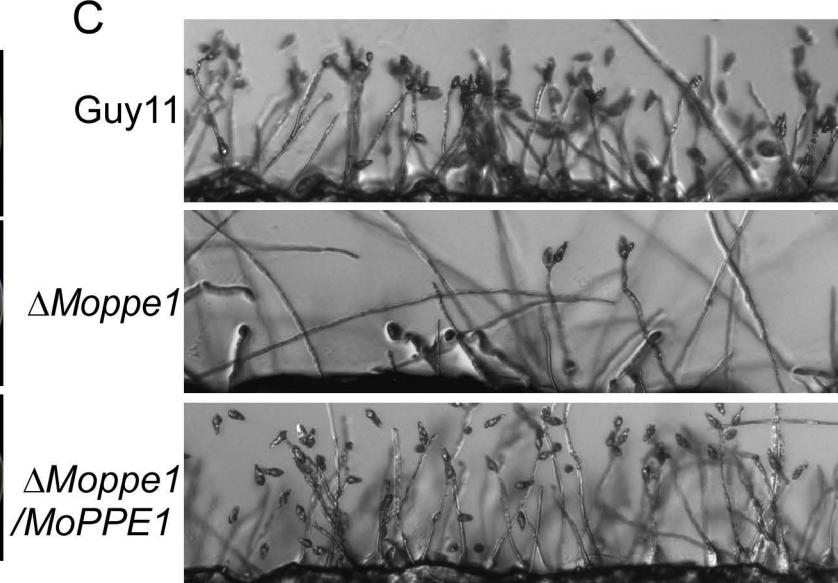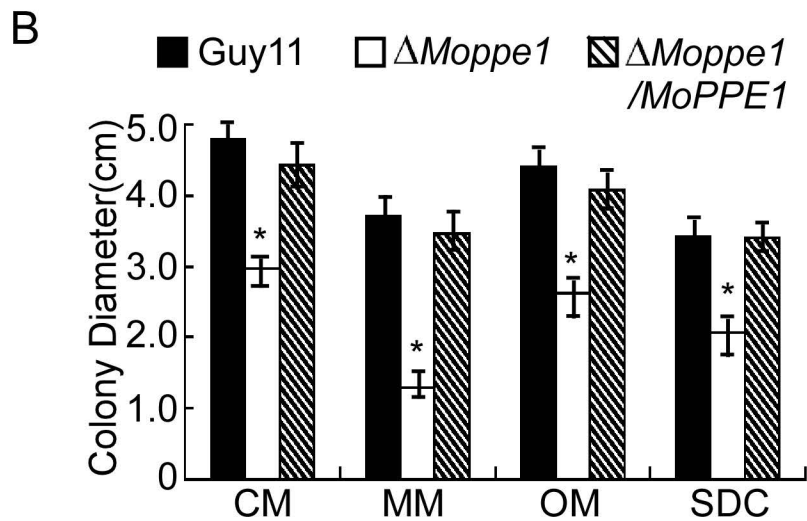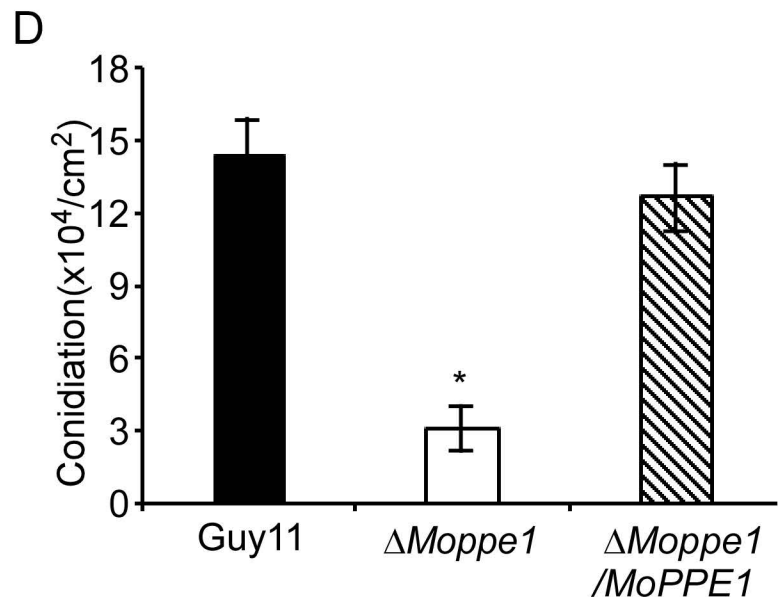

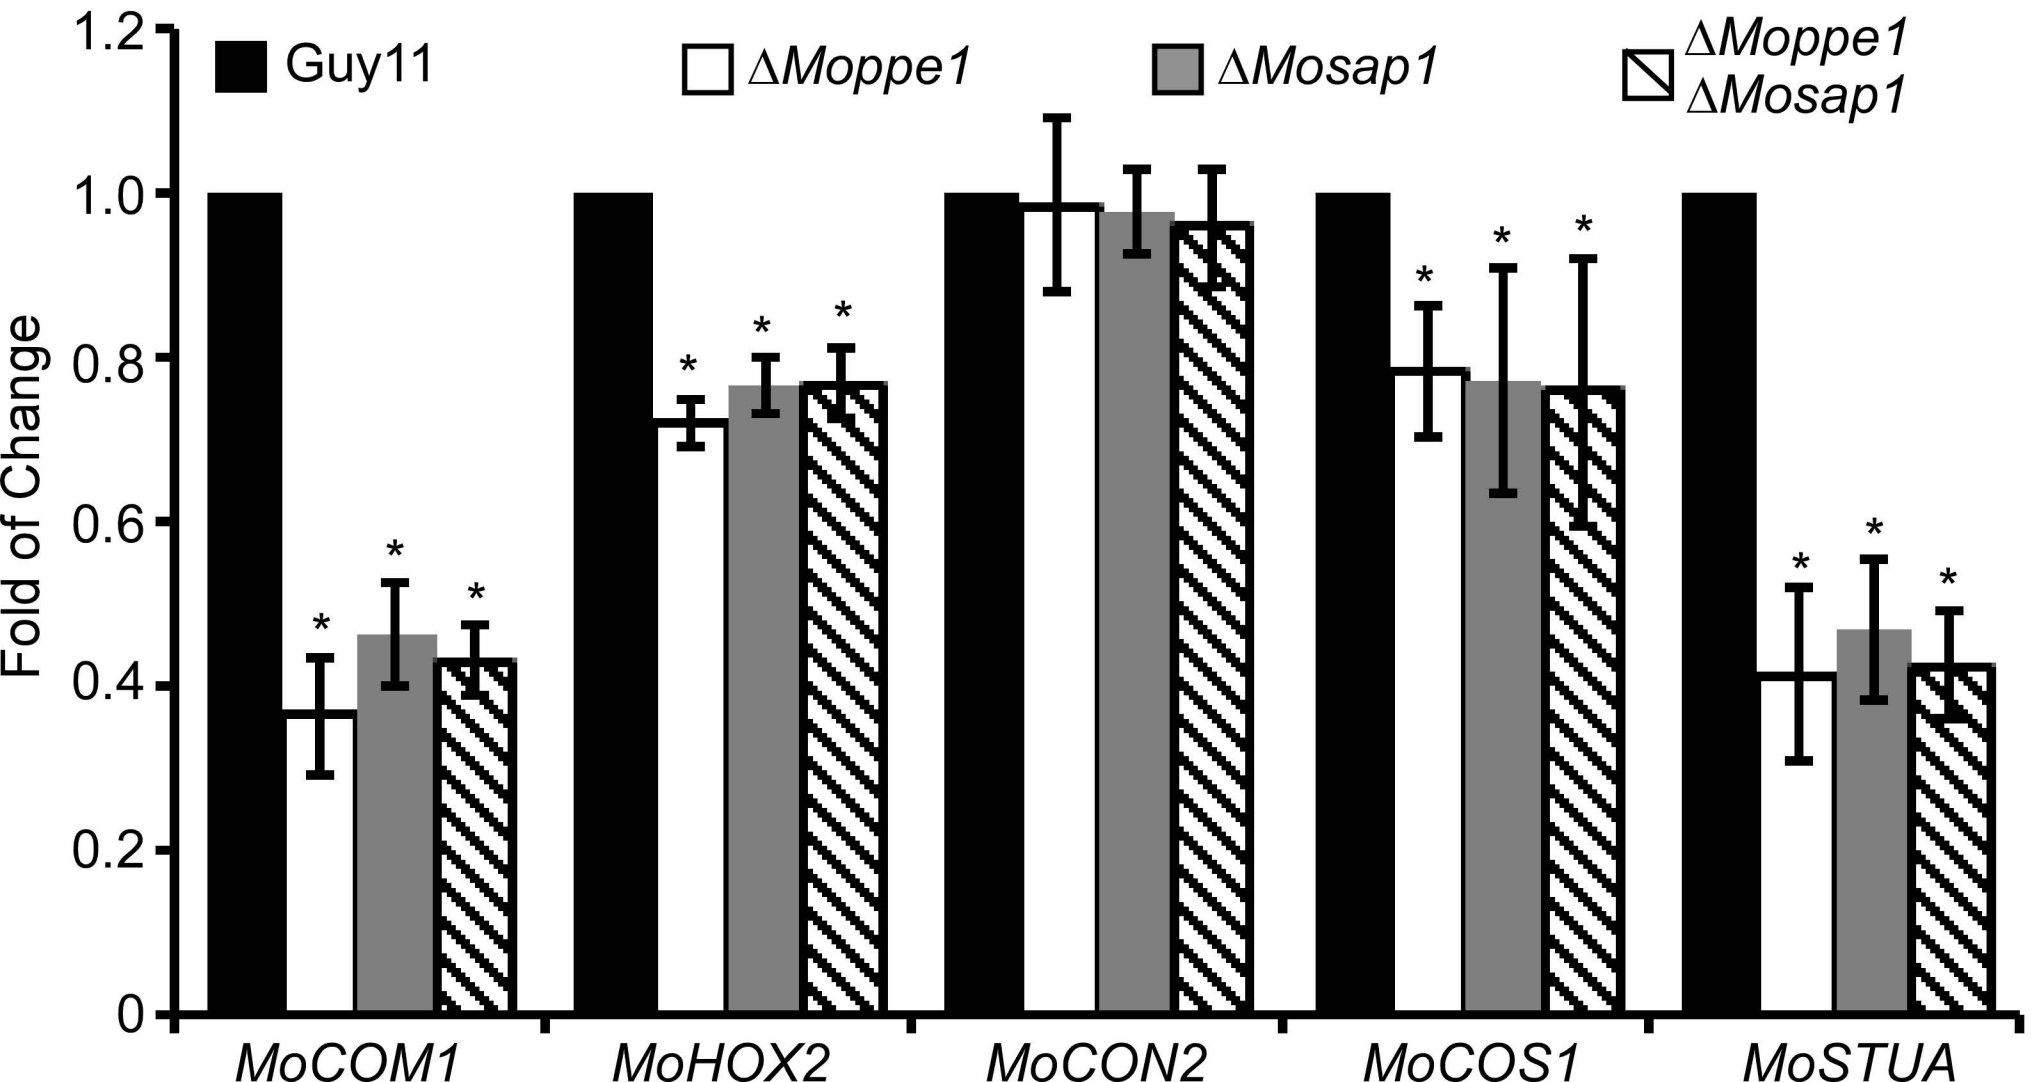

Guy11

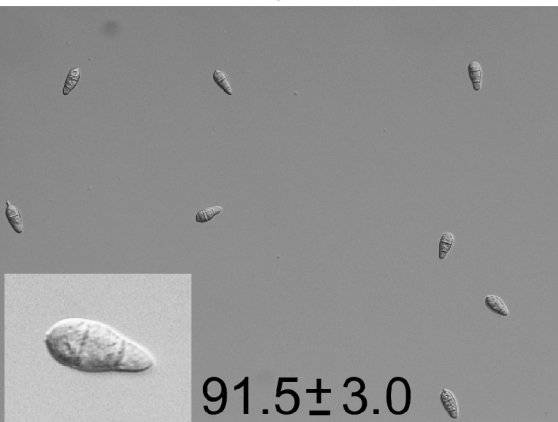

$91.5 \pm 3.0$

$\Delta Moppe1$

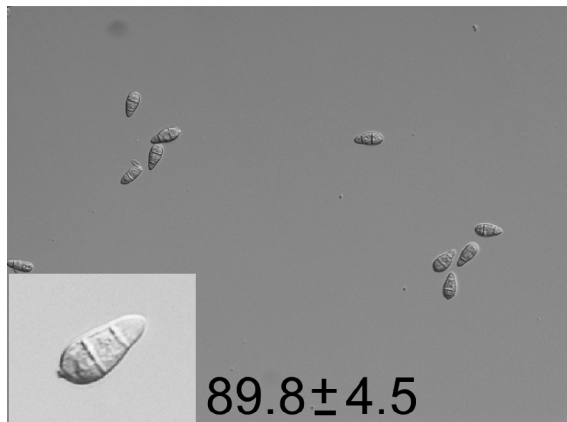

$89.8 \pm 4.5$

$\Delta Mosap1$

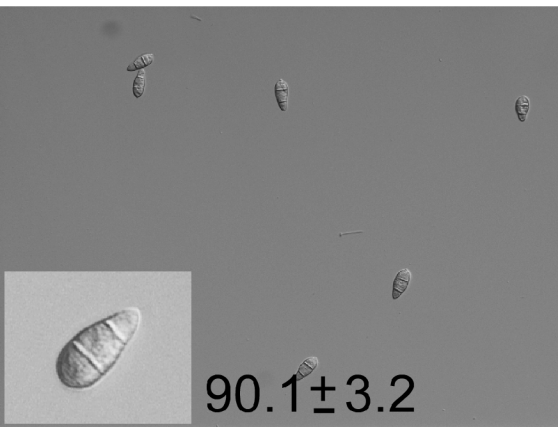

$90.1 \pm 3.2$

$\Delta Moppe1$

$\Delta Mosap1$

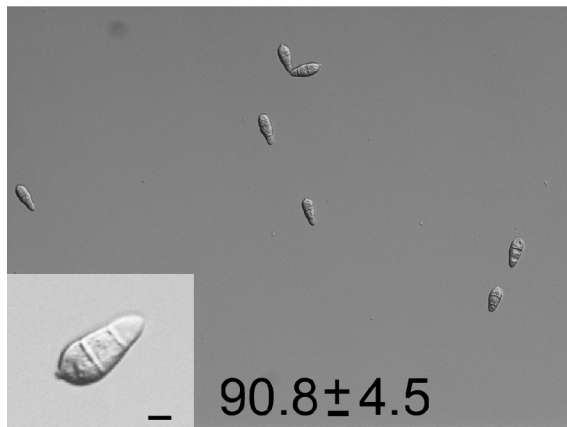

$90.8 \pm 4.5$

Guy11

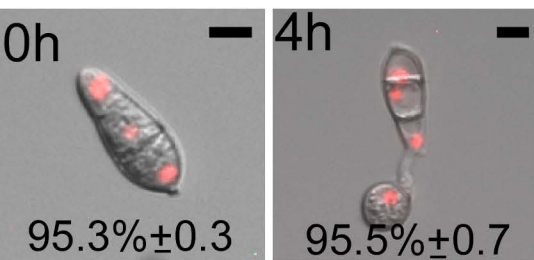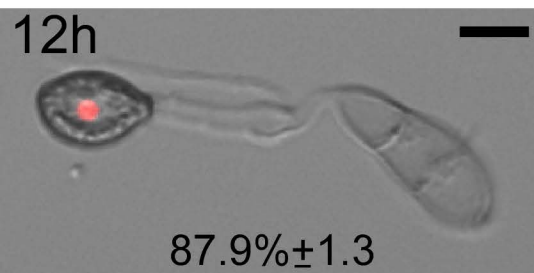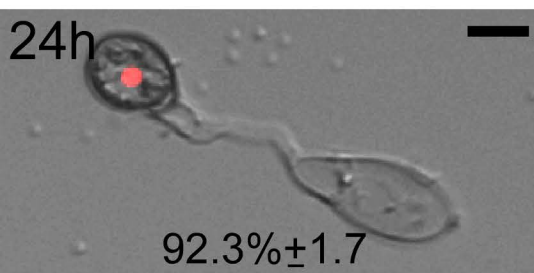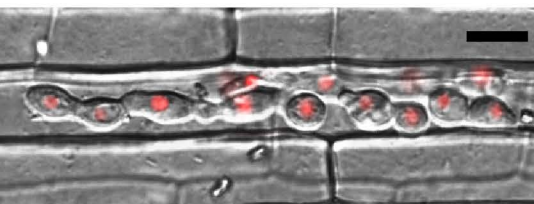

$\Delta Moppe1$

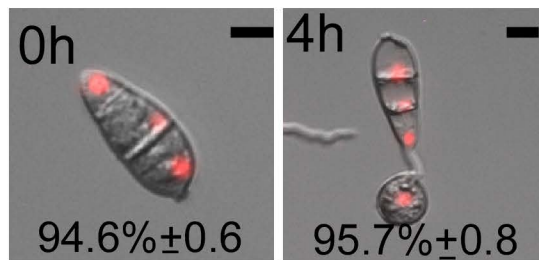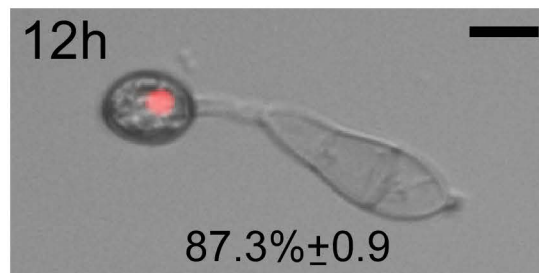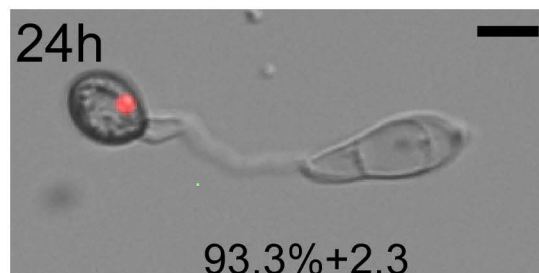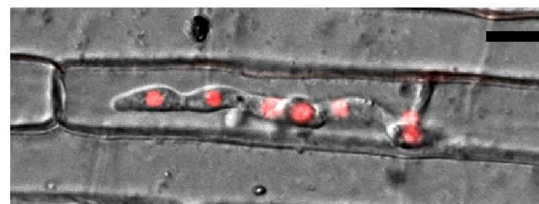

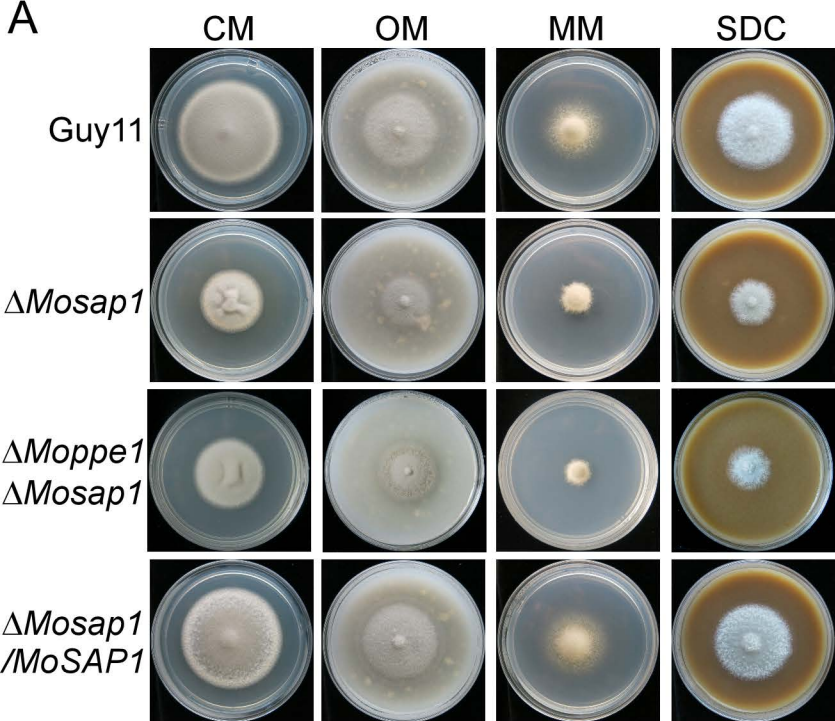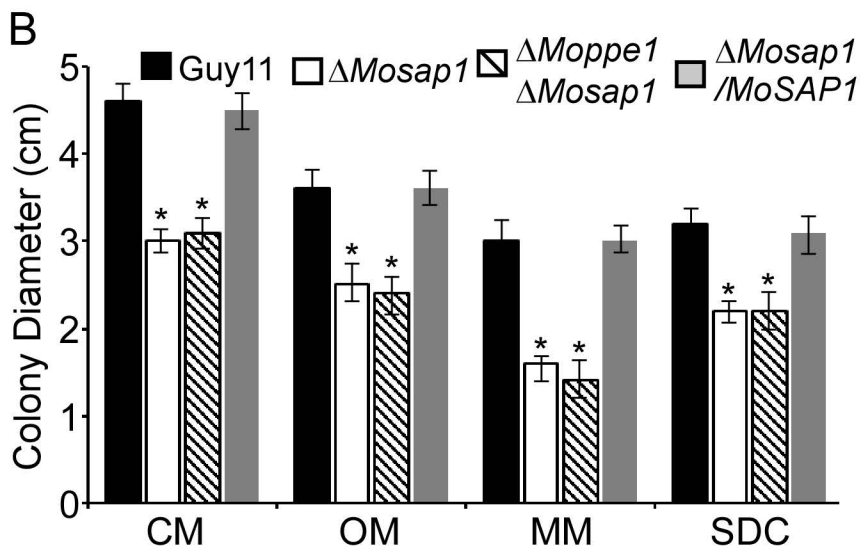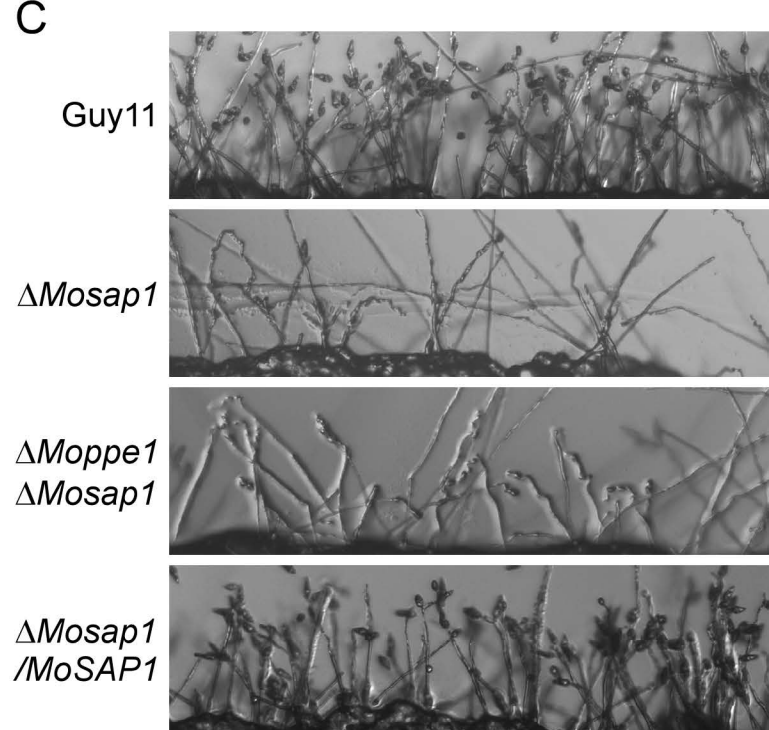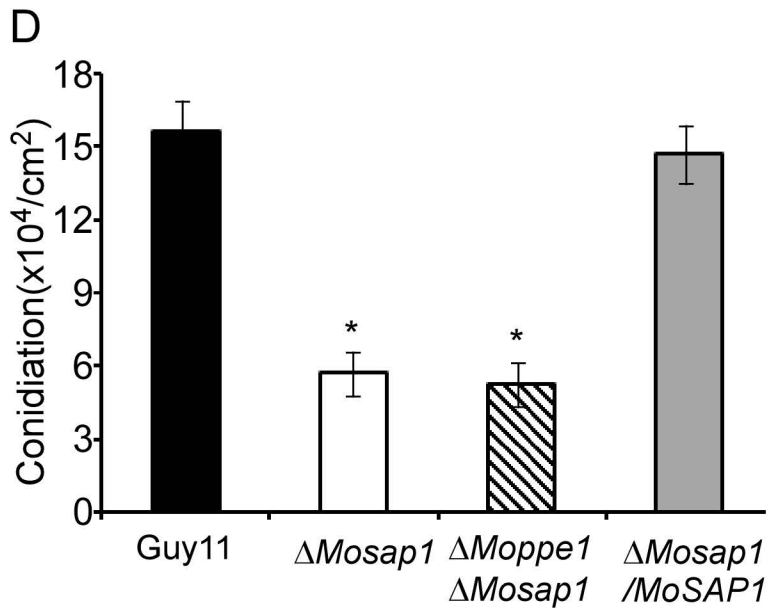

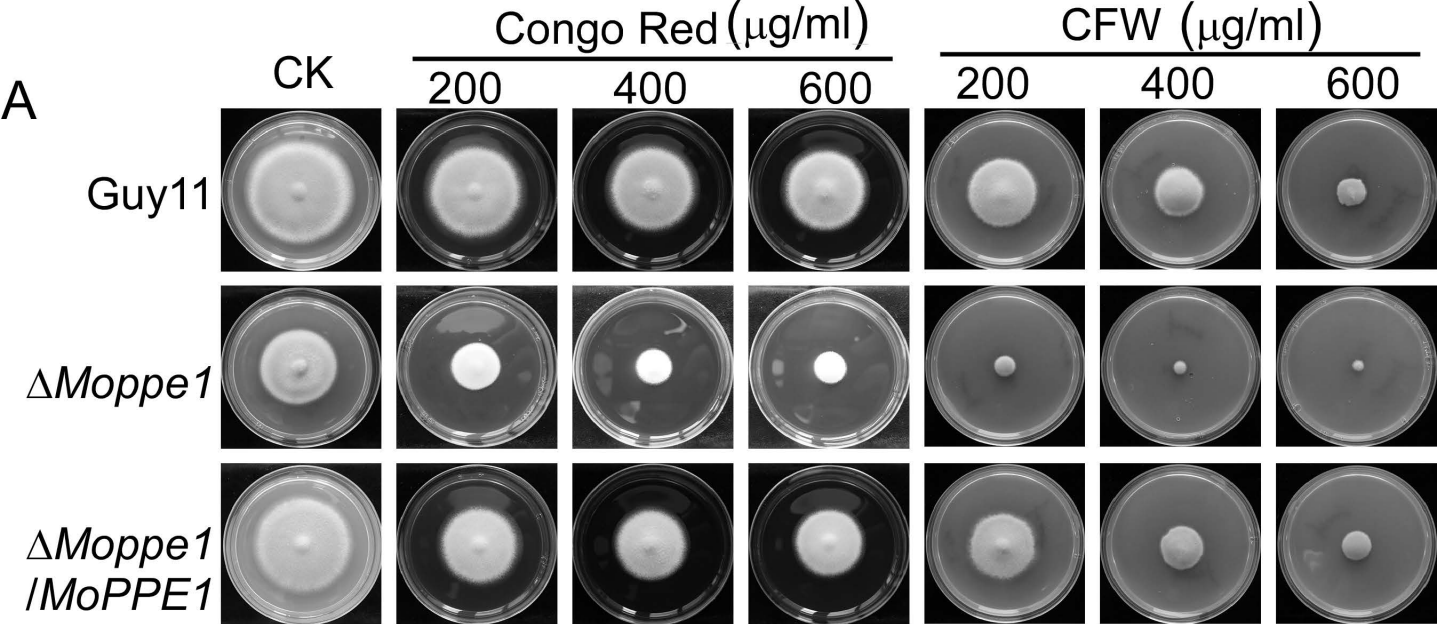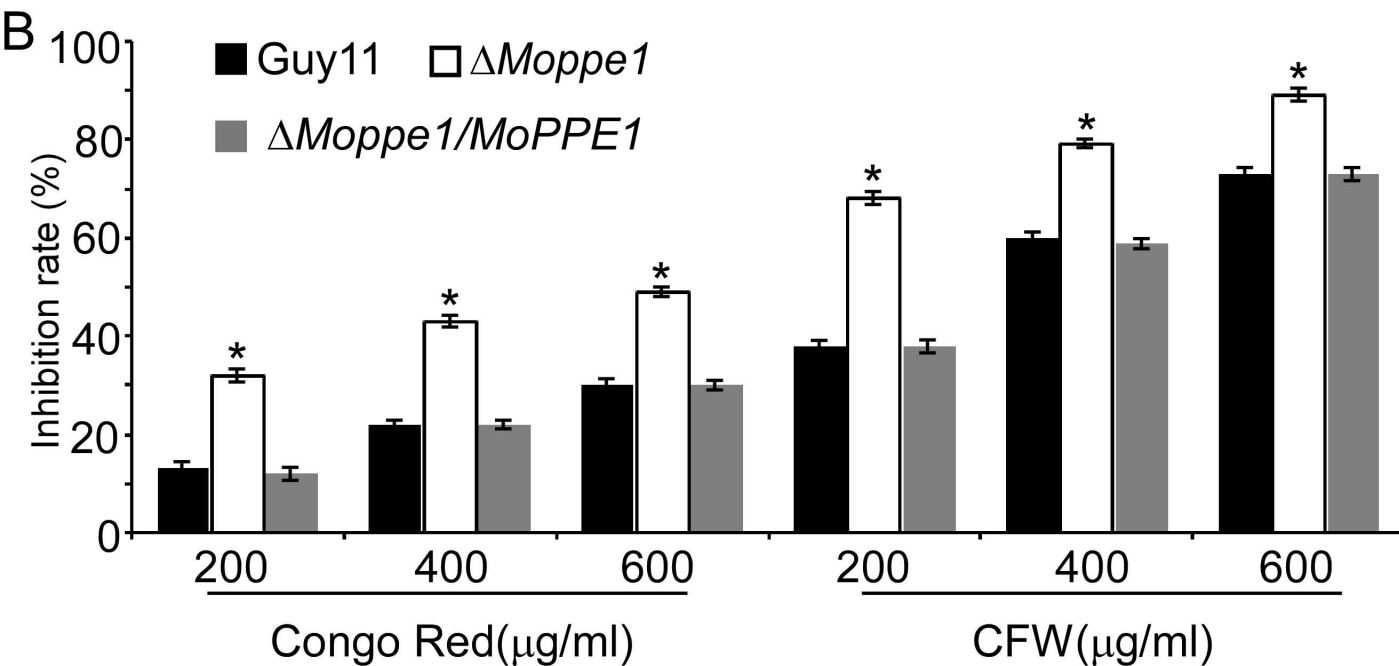



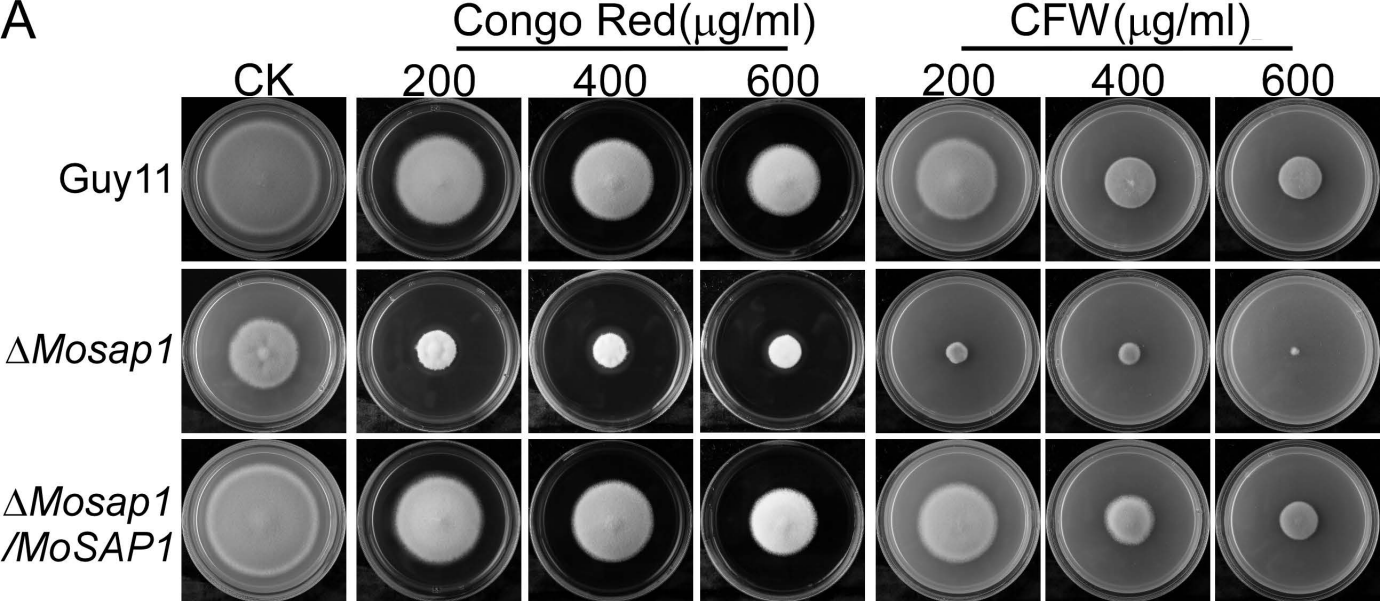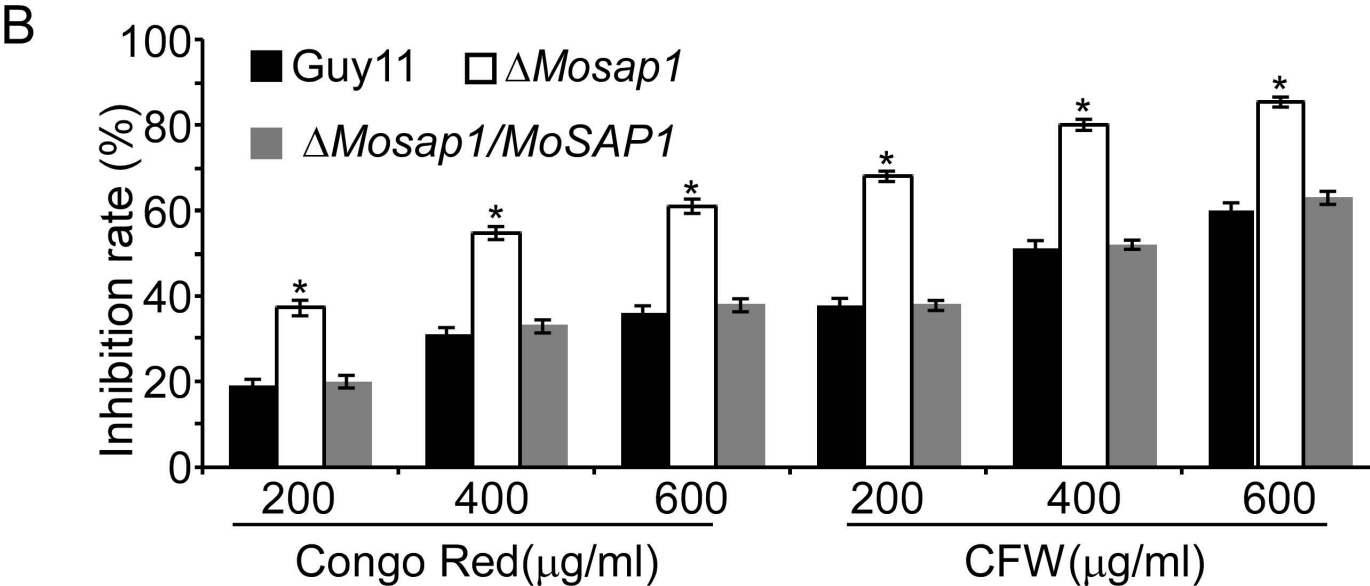

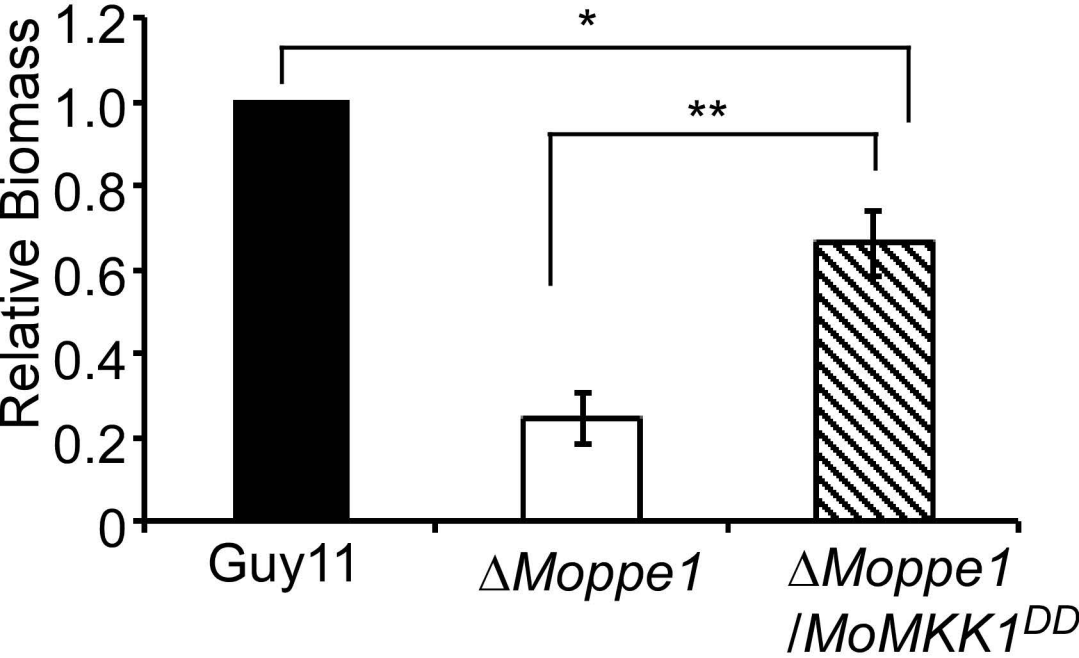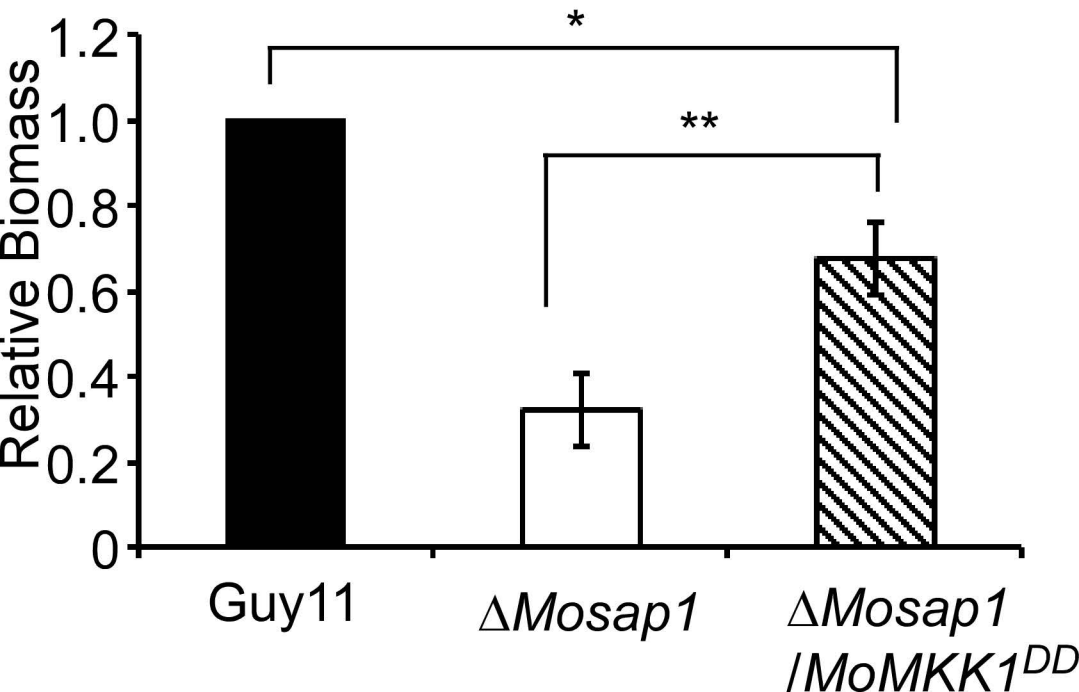

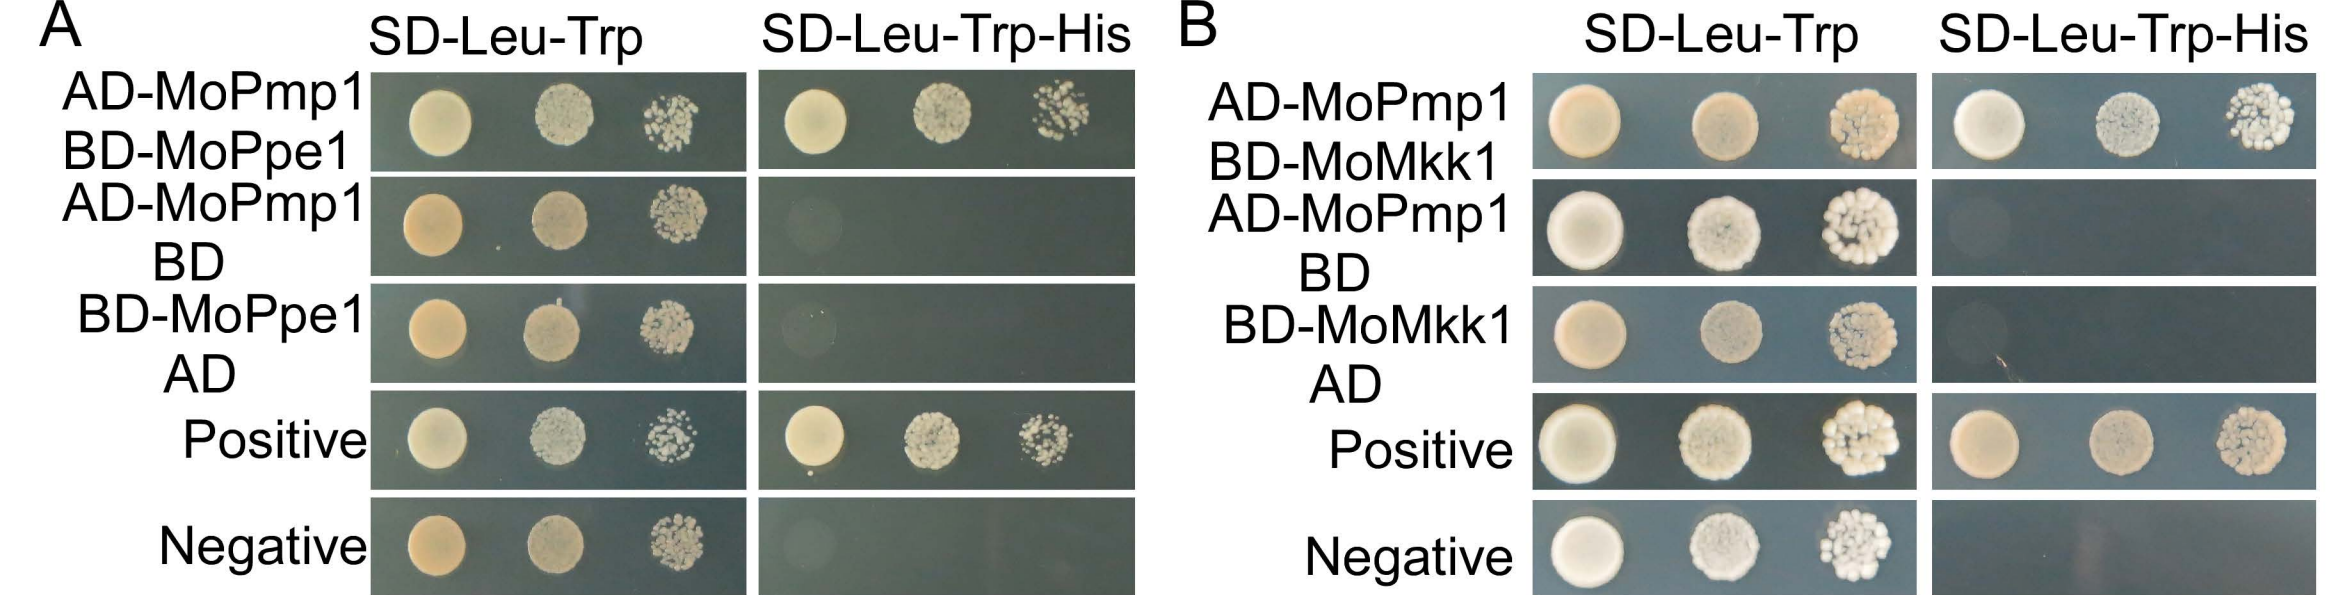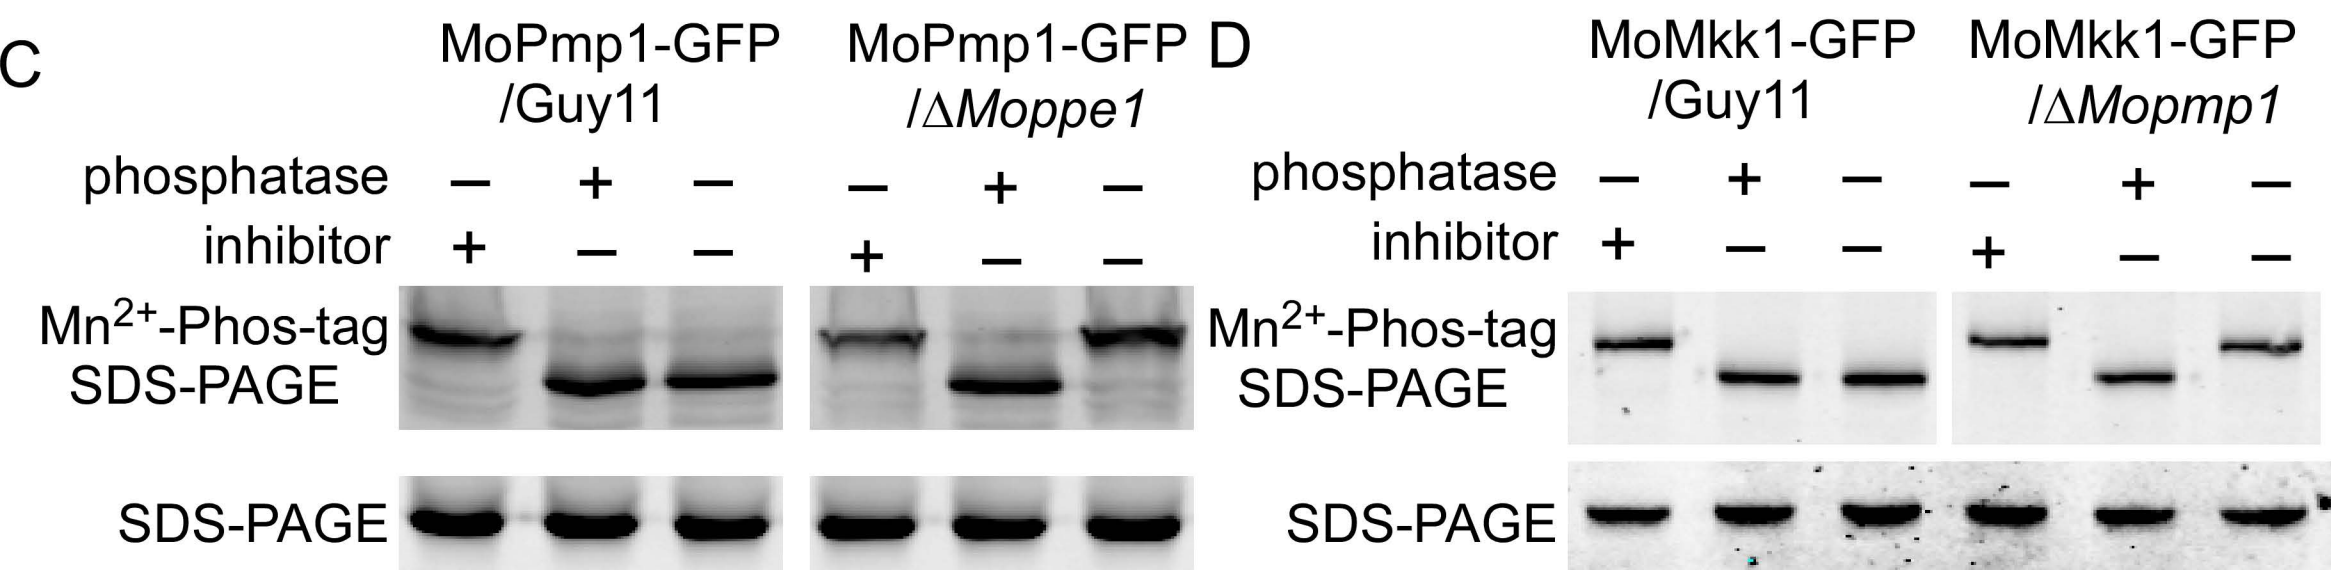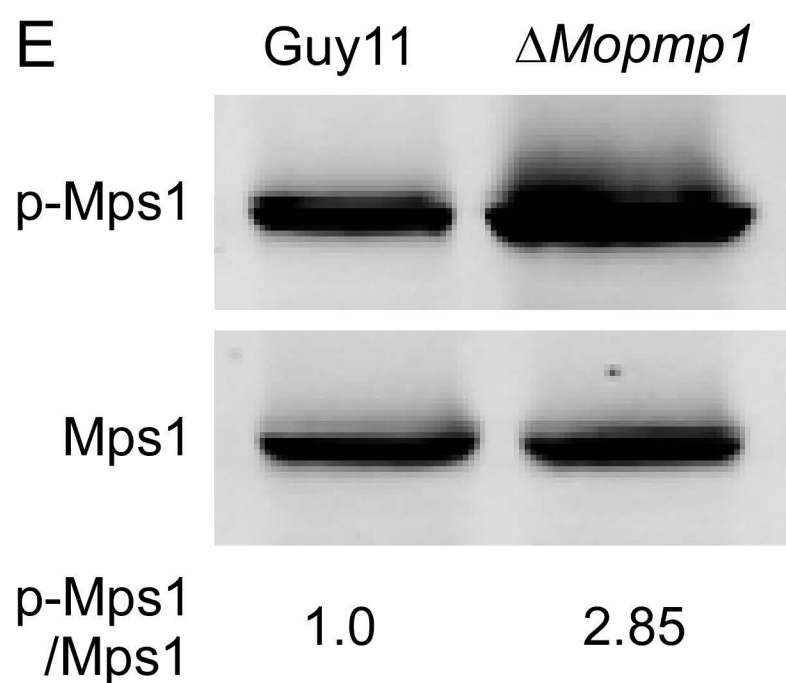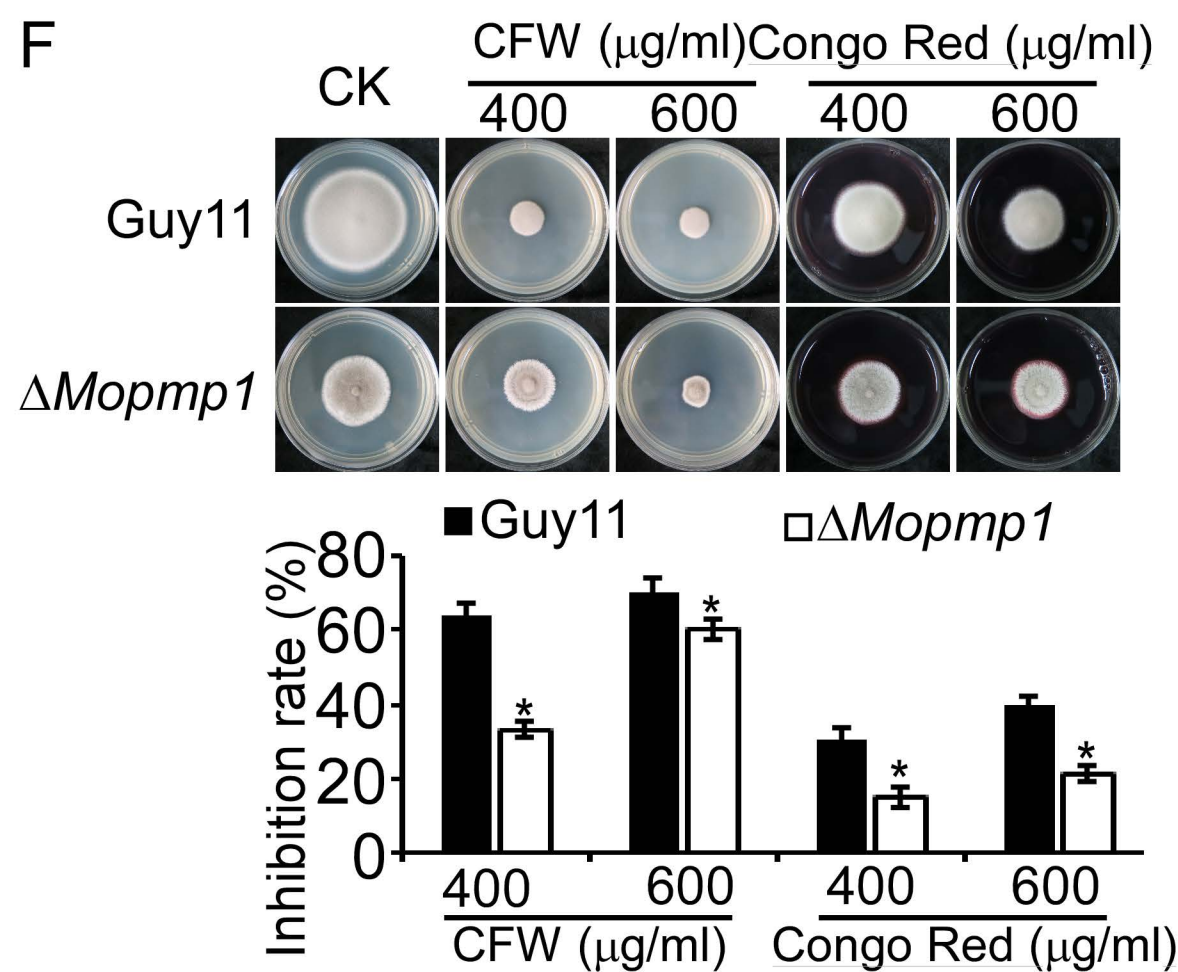

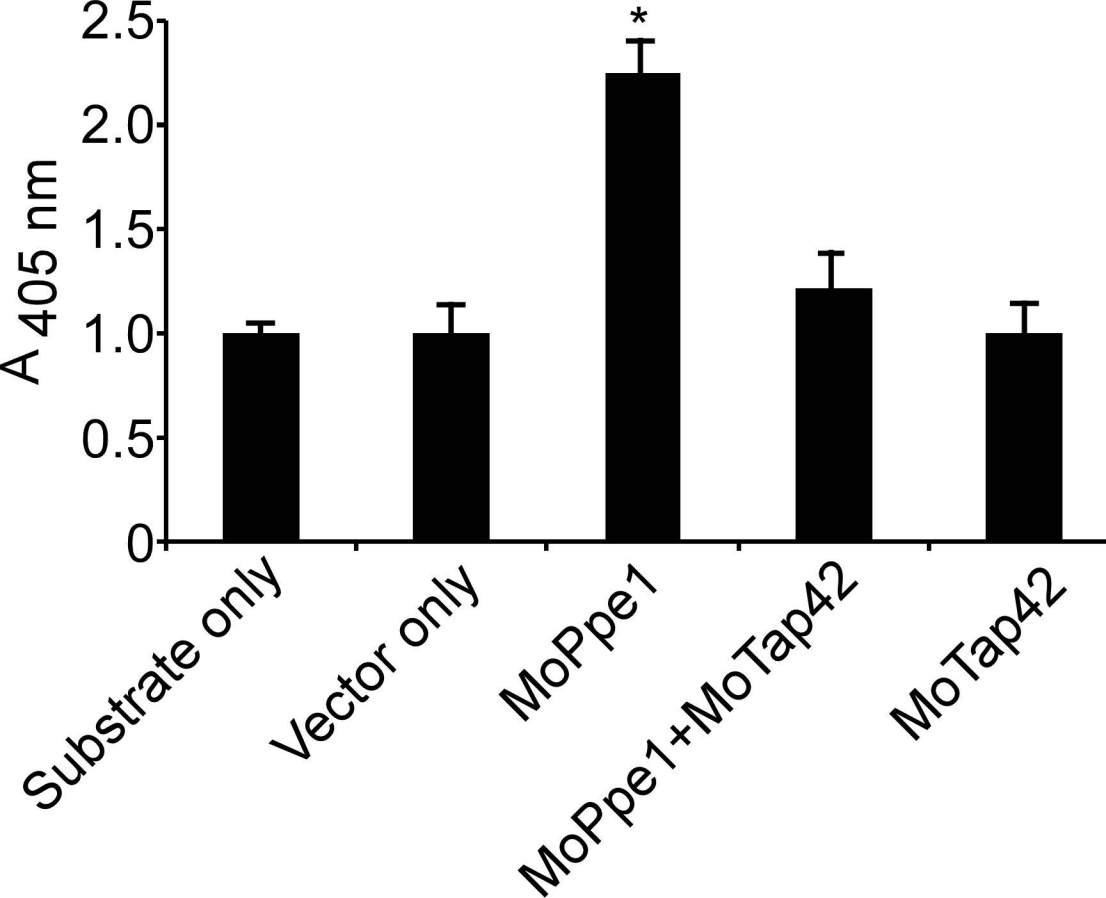

A

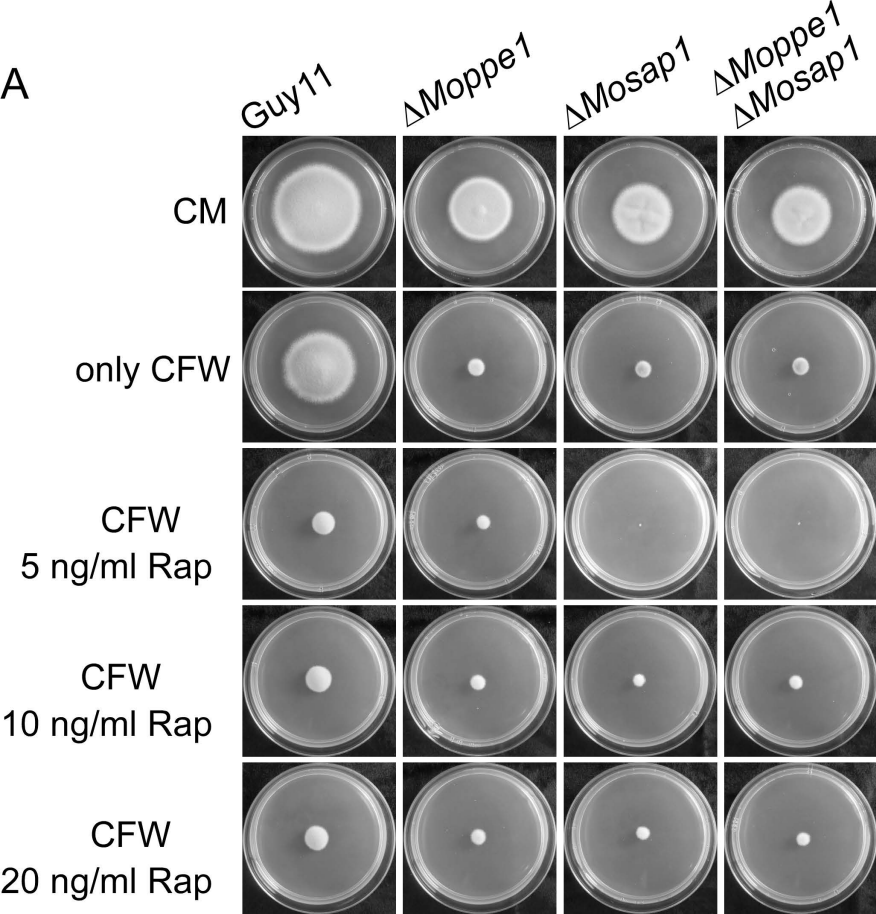

B

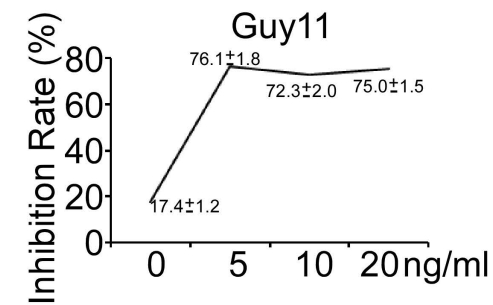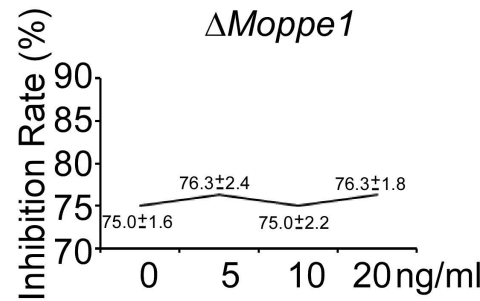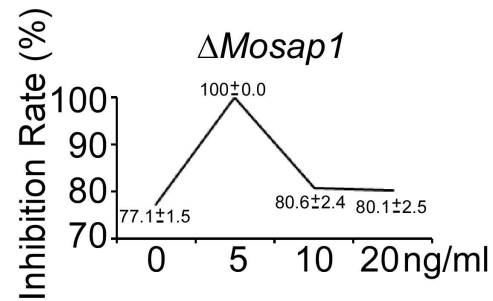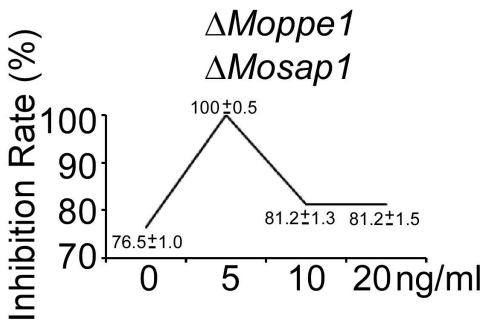

**Fig. S1. Complementation of the yeast mutants with *Magnaporthe oryzae* gene counterparts.** (A) *MoPPE1* could completely suppress the growth defect of yeast *SIT4* deletion mutant at 37 °C. The yeast *SIT4* mutant was complemented with *MoPPE1* cDNA to generate the strain BY4741 $\Delta$ *sit4* + pYES2-*MoPPE1*. The WT strain BY4741 and *SIT4* mutant transformed with empty pYES2 vector, respectively, were used as controls. Serial dilutions of cell suspension of each strain were spotted under different stresses as indicated in the Fig. (B) *MoNut1* partially repressed the *S. cerevisiae* *GLN3* mutant. (C) *MoSAP1* could completely suppress the yeast mutant *SAP190* in 1 mM tunicamycin and could partially repress the yeast mutant *SAP185* which exhibit an increased resistance in 300  $\mu$ g/ml hygromycin B, *SAP155* which was sensitive to 200  $\mu$ g/ml hygromycin B and *SAP4* with the stress of 1 mM H<sub>2</sub>O<sub>2</sub> that mutant is more resistant.

**Fig. S2. Targeted genes knockout strategy and confirmation by Southern blot analysis.** (A) Strategy of knocking out target genes in *M. oryzae* genome. Thin lines below the arrows indicate the probe sequence of each gene. (B) Southern blot analysis was used to confirm the *MoPPE1* deletion and the copy of the *HPH* gene. The genomic DNA of Guy11 and  $\Delta$ *Moppe1* mutant was digested with *EcoR* I and hybridized with probes. (C-F) Strategies of knocking out *MoSAP1* and *MoNUT1* and verified by southern blot. The genomic DNA of Guy11 and  $\Delta$ *Mosap1* mutant was digested with *Xba* I and  $\Delta$ *Monut1* mutant was digested with *Kpn* I. (G) The  $\Delta$ *Moppe1*  $\Delta$ *Mosap1* double mutant strain was generated with a 3.4 kb fragment, which included the flanking sequences of *MoPPE1* and the bleomycin sequence transformed into  $\Delta$ *Mosap1* mutant protoplasts then using the PCR to identify the putative double mutant. (H) The PCR results of verification the double mutant, number #1 and #12 were the double mutants. (I) The southern blot used to detect the copy of the bleomycin gene in different strains.

**Fig. S3. *MoPpe1* is involved in the vegetative growth and conidiation.** (A) Guy11,  $\Delta$ *Moppe1* mutant and complemented strain were inoculated on CM, MM, OM and SDC media cultured at 28 °C for 7 days, then photographed. (B) Statistical analyses of the [colony](#) diameter from wild-type Guy11,  $\Delta$ *Moppe1* mutant and the complemented strain on different medium. Error bars represent the standard deviations; Asterisks denote statistical significances ( $p < 0.01$ ). (C) Conidia were observed under a light microscope after illumination for 24 h then photographed. (D) The conidia were harvested from the Guy11,  $\Delta$ *Moppe1* mutant and complemented strain incubated on SDC medium for 7 days. The number of conidia were calculated and analysed. Error bars represent the standard deviations. Asterisks represent significant difference ( $p < 0.01$ ).

**Fig. S4. Expression levels of conidiation-related genes.** The expression results of *MoCOM1*, *MoHOX2*, *MoCON2*, *MoCOS1* and *MoSTUA* genes that were shown previously to be important in the process of conidial development. Histogram shown the results of three biology repeats, error bars denote standard errors of three biology experiments. Asterisk denote values that are not significantly different at ( $p < 0.05$ ).

**Fig. S5. There is no great difference in conidial morphology between wild-type and mutants.** Conidia were harvested from different mutants the observed by light microscopy. Bars = 10  $\mu$ m.

**Fig. S6. *MoPpe1* is dispensable function in nuclear division in *M. oryzae*.** (A) Nucleus was viewed, photograph and calculated during appressorium formation at 0, 4, 12, 24 h time point and infection phase with the transformation of H1-RFP into  $\Delta$ *Moppe1* mutant and Guy11 respectively. The merged image shows H1: RFP and DIC. Bars = 10  $\mu$ m.

**Fig. S7. *MoPpe1* and *MoSap1* are important for the vegetative growth and conidia formation of *M. oryzae*.** (A) Guy11,  $\Delta$ *Mosap1* single mutant,  $\Delta$ *Moppe1*  $\Delta$ *Mosap1* double mutant and  $\Delta$ *Mosap1* complemented strain were inoculated on CM, MM, OM and SDC media cultured at 28 °C for 7 days, then photographed. (B) Statistical analyses of the [colony](#) diameter of four different strains on different medium. Error bars represent the standard deviations, asterisks denote statistical significances ( $p < 0.01$ ). (C) The conidia were photographed under a light microscope after illumination for 24 h. (D) Conidia production of Guy11,  $\Delta$ *Mosap1* single mutant, complemented strain and  $\Delta$ *Moppe1*  $\Delta$ *Mosap1* double mutant were collected after 7 days on SDC medium, then calculated and analysed. Error bars represent the standard deviations. Asterisks denote statistical significances ( $p < 0.01$ ).

**Fig. S8. *MoPpe1* is involved in the cell wall stress response of *M. oryzae*.** (A) Guy11,  $\Delta$ *Moppe1* mutant and the complemented strain were incubated on complete medium (CM) plates containing different concentrations of Congo Red (CR), Calcofluor white (CFW) and sodium dodecyl sulfate (SDS) at 28 °C for 7 days. (B) The inhibition rate was determined by plotting the percentage of colonies in the presence of various concentrations of CR, CFW and SDS against regular CM. The asterisks denote statistical significances ( $p < 0.01$ ).

**Fig. S9. *MoSap1* is important for cell wall stress responses of *M. oryzae*.** (A) The wild-type strain,  $\Delta$ *Mosap1* mutant and the complemented strain were incubated on complete medium (CM) plates with different concentrations of Congo

Red (CR), Calcofluor white (CFW) and sodium dodecyl sulfate (SDS) at 28 °C for 7 days. (B) The inhibition rate was determined by plotting the percentage of colonies in the presence of various concentrations of CR, CFW and SDS against regular CM, asterisks denote statistical significances ( $p < 0.01$ )

**Fig. S10. The relative fungal growth assay.** Diseased rice leaves were collected after 7 days inoculation. Total DNA was extracted from per 1.5 g disease leaves and test by qRT-PCR (HiScript II Reverse Transcriptase, Vazyme Biotech Co., Nanjing, China) with 28S/Rubq1 primers. The results were of three biology repeats. Single asterisks denote statistical significances ( $p < 0.05$ ), double asterisks represent statistical significances ( $p < 0.01$ )

**Fig. S11. MoPpe1 regulates the CWI pathway via MoPmp1.** (A) Yeast two hybrid assay for the interaction between MoPpe1 and MoPmp1. The AD-MoPmp1 and BD-MoPpe1 vectors were co-introduced into yeast strain AH109, and the transformants were plated with serial dilutions of yeast cells on SD-Leu-Trp for 3 days and on selective SD-Leu-Trp-His added with 2 mM 3-AT (3-amino-1,2,4-triazole) for 10 days. (B) Interaction between MoMkk1 and MoPmp1. The AD-MoPmp1 and BD-MoMkk1 vectors were co-introduced into yeast strain AH109, and the transformants were plated with serial dilutions of yeast cells on SD-Leu-Trp for 3 days and on selective SD-Leu-Trp-His added with 2.5 mM 3-AT (3-amino-1,2,4-triazole) for 12 days. (C) MoPmp1 was hyperphosphorylated in  $\Delta$ Moppe1 mutant. (D) MoPmp1 dephosphorylate the MoMkk1 in *M. oryzae*. (E) The MoMps1 phosphorylation increased in  $\Delta$ Mopmp1 mutant. (F) The  $\Delta$ Mopmp1 mutant exhibited increased resistance to cell wall stress.

**Fig. S12. Protein phosphatase MoPpe1 possesses the phosphatase activity that is reduced upon MoTap42 addition.** Recombinant His-tagged MoPpe1 and MoTap42 was expressed in bacteria and purified. Phosphatase activity was determined using the indicated proteins and p-nitrophenyl phosphate (pNPP) as a substrate.

**Fig. S13. Rapamycin treatment affects the fungal susceptibility to calcofluor white.** (A) The wild-type strain,  $\Delta$ Moppe1,  $\Delta$ Mosap1 and  $\Delta$ Moppe1  $\Delta$ Mosap1 mutant were incubated with 150  $\mu$ g/ml Calcofluor white (CFW) stress then added with different concentrations of rapamycin 5, 10, 20 ng/ml, respectively, the strains on complete media (CM) as a control. (B) The broken line graph of each strain's inhibition rate with different treatment. Detailed inhibition rate along with positive and negative SD was shown in each graph.

**Table S1.** MoMkk1 and MoPpe1 putative interacting proteins identified by affinity capture assays

**Table S2.** Total of primers were used in this study

**Table S3.** Comparison of mycological characters

**Table S4.** Utilization rate of the strains with different nitrogen source

**S1 Table. Partial of MoMkk1 and MoPpe1 interacting proteins identified by affinity capture assays in *Magnaporthe Oryzae***

| Proteins                           | Putative functions                        | # of unique peptide |
|------------------------------------|-------------------------------------------|---------------------|
| <b>MoMkk1 interacting proteins</b> |                                           |                     |
| MGG_03911                          | serine/threonine-protein phosphatase ppe1 | 7 / 5               |
| MGG_09470                          | myosin regulatory light chain cdc4        | 5 / 6               |
| MGG_04143                          | Ras-like protein Rab-6A                   | 4 / 3               |
| MGG_00450                          | phosphoenolpyruvate carboxykinase         | 5 / 5               |
| MGG_06952                          | hypothetical protein                      | 9 / 11              |
| MGG_15140                          | tyrosine-protein phosphatase pmp1         | 3 / 2               |
| <b>MoPpe1 interacting proteins</b> |                                           |                     |
| MGG_12709                          | MoPpe1 associated protein MoSap1          | 8 / 12              |
| MGG_01540                          | MoTap42                                   | 11 / 13             |
| MGG_02755                          | nitrogen regulatory protein NUT1          | 12 / 9              |
| MGG_06362                          | small COPII coat GTPase                   | 3 / 6               |
| MGG_15140                          | tyrosine-protein phosphatase pmp1         | 4 / 3               |
| MGG_09480                          | conserved hypothetical protein            | 5 / 3               |
| MGG_01742                          | elongation factor 2                       | 8 / 13              |
| MGG_01490                          | conserved hypothetical protein            | 11 / 6              |

**S2 Table. Primers used in this study**

| Primer name   | Sequence (5'-3')                                               | Remark                                  |
|---------------|----------------------------------------------------------------|-----------------------------------------|
| PPE1 F1       | TAAC TCGAGT GCCACACCTCAAGCTGGTGT                               | amplify <i>MoPPE1</i> 5' flank sequence |
| PPE1 F2       | TAAGATATCTAGCTGGTGTCCAGGTTGCTG                                 | amplify <i>MoPPE1</i> 5' flank sequence |
| PPE1 F3       | TAAACTAGTGATACCGATATGGCAAAGTGGC                                | amplify <i>MoPPE1</i> 3' flank sequence |
| PPE1 F4       | TAAGAGCTCAGTGTTCCTCAAGTCCGCAGT                                 | amplify <i>MoPPE1</i> 3' flank sequence |
| PPE1 KO-L     | CAGAAATCACGGATCCCAAGCTG                                        | amplify <i>MoPPE1</i> probe sequence    |
| PPE1 KO-R     | CATGAACACAGAGCACTGAACC                                         | amplify <i>MoPPE1</i> probe sequence    |
| PPE1 BY       | GTCCATCAAAGGCATGACATAC                                         | validation of <i>MoPPE1</i> deletion    |
| HPH R         | GCTGATCTGACCAGTTGCCTA                                          | (HPH)                                   |
| PPE1 HB-F1    | ACTCACTATAGGGCGAATTGGGTACTCAAATTGGTTCATTTG<br>CGTCTTCCCATTGAGC | <i>MoPPE1</i> complementation           |
| PPE1 HB-F2    | CACCACCCCGGTGAACAGCTCCTCGCCCTTGCTACCAAGAA<br>ATAGTCCCTGGGCCTC  | <i>MoPPE1</i> complementation           |
| PPE1 Flag F1: | CTATAGGGCGAATTGGGTACTCAAATTGGTTCATACTCCGTTT<br>TGAGAAGATGC     | Construction of <i>MoPPE1</i> -Flag     |
| PPE1 Flag F2: | CTTTATAATCACCGTCATGGTCTTTGTAGTCCAAGAAATAGTC<br>CCCTGGGCCTC     | Construction of <i>MoPPE1</i> -Flag     |
| PPE1 Stag F1: | TTTCGTAGGAACCAATCTTCAAATGGCTTCTACCGTGCCGA<br>AG                | Construction of <i>MoPPE1</i> -Stag     |
| PPE1 Stag F2: | TTCGAATTTAGCAGCAGCGGTTCTTTCAAGAAATAGTCCCT                      | Construction of <i>MoPPE1</i> -Stag     |



|                 |                                                                      |                                         |
|-----------------|----------------------------------------------------------------------|-----------------------------------------|
|                 | GGGCCTC                                                              |                                         |
| SAP1 F1:        | TAAGTCGACGAGTTAGTTCGCTGGTTGGC                                        | amplify <i>MoSAP1</i> 5' flank sequence |
| SAP1 F2:        | TAAGAATTCCCTGGCGCGCACTCAAGCAG                                        | amplify <i>MoSAP1</i> 5' flank sequence |
| SAP1 F3:        | TAAGGATCCGACGGGAGAAACGATTGTCCC                                       | amplify <i>MoSAP1</i> 3' flank sequence |
| SAP1 F4:        | TAAACTAGTTCATCATAATCACATCGCGG                                        | amplify <i>MoSAP1</i> 3' flank sequence |
| SAP1 KO-L       | GCGAACTCATGGCCGAACTTCTTCACTG                                         | amplify <i>MoSAP1</i> probe sequence    |
| SAP1 KO-R       | GAAGCATCGGTCATCATCACATCAGAACC                                        | amplify <i>MoSAP1</i> probe sequence    |
| SAP1 BY         | CTATCTGGCCTTATCTACCTGG                                               | validation of <i>MoSAP1</i> deletion    |
| SAP1 HB-F1      | ACTCACTATAGGGCGAATTGGGTACTCAAATTGGTTCTATCT<br>GGCCTTATCTACCTGG       | <i>MoSAP1</i> complementation           |
| SAP1 HB-F2      | CACCACCCCGGTGAACAGCTCCTCGCCCTTGCTCACAGCAAG<br>CTCCCTTATGTTCTC        | <i>MoPPE1</i> complementation           |
| NUT1 F1:        | TAACTCGAGCGGCTGCTCCTTGTAAGCAAAG                                      | amplify <i>MoNUT1</i> 5' flank sequence |
| NUT1 F2:        | TAAGAATTGCTTGGCGGCTGGATCCTTTATTC                                     | amplify <i>MoNUT1</i> 5' flank sequence |
| NUT1 F3:        | TAATCTAGAACTTCTCCCCAAAACAACAGGG                                      | amplify <i>MoNUT1</i> 3' flank sequence |
| NUT1 F4:        | TAACCGCGGCTAGGAAAGAAGTCTTCACTG                                       | amplify <i>MoNUT1</i> 3' flank sequence |
| NUT1 KO-L       | GTACGAACAGCAAGGCGTGAAG                                               | amplify <i>MoNUT1</i> probe sequence    |
| NUT1 KO-R       | CGTTAGCGCTTCTGCTCTGCTC                                               | amplify <i>MoNUT1</i> probe sequence    |
| NUT1 BY         | CATCTTCGATGTGATTGCGGATCG                                             | validation of <i>MoNUT1</i> deletion    |
| NUT1 HB-F1      | ACTCACTATAGGGCGAATTGGGTACTCAAATTGGTTCATCTTC<br>GATGTGATTGCGGATCG     | <i>MoNUT1</i> complementation           |
| NUT1 HB-F2      | CACCACCCCGGTGAACAGCTCCTCGCCCTTGCTCACCAGACT<br>CATGGTCAACCAATCCCAC    | <i>MoNUT1</i> complementation           |
| NUT1 NGFP ProF1 | ACTCACTATAGGGCGAATTGGGTACTCAAATTGGTTCATCTTCGA<br>TGTGATTGCGGATCG     | Construction of GFP-NUT1                |
| NUT1 NGFP ProR1 | TGTTGCGGCTGGATCCTTTATTC                                              | Construction of GFP-NUT1                |
| Gln3GFPF        | GAATAAAGGATCCAGCCGCAACAATGGTGAGCAAGGCGAGG<br>A                       | Construction of GFP-NUT1                |
| Gln3GFPR        | CTTGACAGCTCGTCCATGC                                                  | Construction of GFP-NUT1                |
| MoGln3GeneF1    | GCATGGACGAGCTGTACAAGATGAATCCCACAATAACAGAGC                           | Construction of GFP-NUT1                |
| MoGln3GeneR1    | CACCACCCCGGTGAACAGCTCCTCGCCCTTGCTCACTTACAGA<br>CTCATGGTCAACCAATCCCAC | Construction of GFP-NUT1                |
| MoTap42 GFPF1:  | ACTCACTATAGGGCGAATTGGGTACTCAAATTGGTTGTACATA<br>CAACCACCTCCTGCTCCTG   | Construction of <i>TAP42</i> -GFP       |
| MoTap42 GFPR1:  | CACCACCCCGGTGAACAGCTCCTCGCCCTTGCTCACACCCCTGT<br>TCAGAGTGTTTCC        | Construction of <i>TAP42</i> -GFP       |
| AD/BD-PPE1 F1:  | TAACATATGATGGCTTCTACCGTGCCGAAG                                       | Construction of AD/BD-PPE1              |
| AD/BD-PPE1 R1:  | TAAGAATTCTCACAAGAAATAGTCCCCTGGG                                      | Construction of AD/BD-PPE1              |
| AD/BD-SAP1 F1:  | TAACATATGATGTTCTGGCGGTTTGGCGGCTA                                     | Construction of AD/BD-SAP1              |
| AD/BD-SAP1 R1:  | TAAGAATTCTCAAGCAAGTCCCTTATGTTT                                       | Construction of AD/BD-SAP1              |
| AD/BD-TAP42F1   | TAACATATGATGGAGCAAGATCAGACCCAGGA                                     | Construction of AD/BD-TAP42             |
| AD/BD-TAP42R1   | TAAGAATTCTTAACCCCTGTTTCAGAGTGTTT                                     | Construction of AD/BD-TAP42             |
| PPE1 RFPF1      | ACTCACTATAGGGCGAATTGGGTACTCAAATTGGTTCATTTGC<br>GTCTTCCCATTGAGC       | Construction of <i>PPE1</i> -RFP        |

|                       |                                                              |                                                 |
|-----------------------|--------------------------------------------------------------|-------------------------------------------------|
| PPE1 RFPR1            | CAAGAAATAGTCCCCTGGGCCTC                                      | Construction of <i>PPE1</i> -RFP                |
| RFPF:                 | GAGGCCAGGGGACTATTTCTTGATGGCCTCCTCCGAGGACGT                   | Construction of <i>PPE1</i> -RFP                |
| RFPR:                 | CACCACCCCGGTGAACAGCTCCTCGCCCTTGCTCACTTAGGC<br>GCCGGTGGAGTGGC | Construction of <i>PPE1</i> -RFP                |
| PPE1 DBF1:            | GTATCGATAAGCTTGATATC CTTGCTGGCAACATTCGTAC                    | Construction of double mutant                   |
| PPE1 DBR1:            | GGTATCGTTGCGGTCTTCG                                          | Construction of double mutant                   |
| bleF                  | CGAAGACCGCAACGATACCCGAGGGTACCTGAAGGAGCAT                     | Construction of double mutant                   |
| bleR                  | AGATGAGCTGTATCTGGAAG                                         | Construction of double mutant                   |
| PPE1 DBF2             | CTTCCAGATACAGCTCATCT GATAAAGACAAAAGAATGTC                    | Construction of double mutant                   |
| PPE1 DBR2             | GGTGGCGGCCGCTCTAGAAGTACAGTGTTCCTTCAAGTCCG<br>CAG             | Construction of double mutant                   |
| 28S rDNA LL           | TACGAGAGGAACCGCTCATTAGATAATTA                                | qRT-PCR                                         |
| 28S rDNA RR           | TCAGCAGATCGTAACGATAAAGCTACTC                                 | qRT-PCR                                         |
| Rubq1 LL              | GTGGTGGCCAGTAAAGTCTC                                         | qRT-PCR                                         |
| Rubq1 RR              | GGACACAATGATTAGGGATCA                                        | qRT-PCR                                         |
| Rice_EF1 $\alpha$ _QF | CTTCAACACCCCTGCTATG                                          | qRT-PCR Primer of <i>EF1<math>\alpha</math></i> |
| Rice_EF1 $\alpha$ _QR | CCGTTGTGGTGAATGAGTAA                                         | qRT-PCR Primer of <i>EF1<math>\alpha</math></i> |
| Rice_Cht1-F           | CGTGGTGACCAACATCATCA                                         | qRT-PCR Primer of <i>Cht1</i>                   |
| Rice_Cht1-R           | GAGTTGAAAGGCCTCTGGTTGT                                       | qRT-PCR Primer of <i>Cht1</i>                   |
| Rice_PR1 $\alpha$ _QF | TCTTCATCACCTGCAACTACTC                                       | qRT-PCR Primer of <i>PR1<math>\alpha</math></i> |
| Rice_PR1 $\alpha$ _QR | ATTCATCGGATTTATTCTCACC                                       | qRT-PCR Primer of <i>PR1<math>\alpha</math></i> |
| Rice_PBZ1_QF          | CTACTATGGCATGCTCAAGAT                                        | qRT-PCR Primer of <i>PBZ1</i>                   |
| Rice_PBZ1_QR          | ATAGAAAGGCACATAAACACAA                                       | qRT-PCR Primer of <i>PBZ1</i>                   |

### S3 Table. Comparison of mycological characters

| Strain                             | Germination rate(%) <sup>a</sup> | Appressorium formation (%) <sup>b</sup> | Appressorium formation (%) <sup>c</sup> |
|------------------------------------|----------------------------------|-----------------------------------------|-----------------------------------------|
| Guy11                              | 95.2 $\pm$ 1.1                   | 94.7 $\pm$ 1.4                          | 93.8 $\pm$ 1.5                          |
| <i>Moppe1</i>                      | 95.0 $\pm$ 1.2                   | 95.1 $\pm$ 1.8                          | 94.5 $\pm$ 1.2                          |
| $\Delta$ <i>Moppe1/MoPPE1</i>      | 95.2 $\pm$ 1.3                   | 95.0 $\pm$ 1.1                          | 94.4 $\pm$ 1.2                          |
| $\Delta$ <i>Mosap1</i>             | 94.5 $\pm$ 1.6                   | 94.7 $\pm$ 1.7                          | 94.1 $\pm$ 1.3                          |
| $\Delta$ <i>Mosap1/ MoSAP1</i>     | 95.1 $\pm$ 0.8                   | 95.4 $\pm$ 1.3                          | 93.8 $\pm$ 1.5                          |
| $\Delta\Delta$ <i>Moppe1Mosap1</i> | 93.4 $\pm$ 1.8                   | 94.5 $\pm$ 1.6                          | 94.7 $\pm$ 1.2                          |

<sup>a</sup> Percentage of conidial germination on artificial surface at 4 hpi.

<sup>b</sup> Percentage of appressorium formation on artificial surface at 24 hpi.  $\pm$ SD was calculated from three repeated experiments.

<sup>c</sup> Percentage of appressorium formation on artificial surface at 24 hpi.  $\pm$ SD, treated with 10 ng/ml

rapamycin, calculated from three repeated experiments .

**S4 Table. The relative growth rate of the tested strains with different nitrogenous source compared to CM media respectively, following seven days growth**

| Growth media                                                                     | Utilization rate % |                 |                 |                                    |                 |
|----------------------------------------------------------------------------------|--------------------|-----------------|-----------------|------------------------------------|-----------------|
|                                                                                  | Guy11              | $\Delta Moppe1$ | $\Delta Mosap1$ | $\Delta Moppe1$<br>$\Delta Mosap1$ | $\Delta Monut1$ |
| GMM+YE                                                                           | 90±0.8             | 91.3±1.2        | 90.6±1.5        | 92±1.3                             | 91.3±1.0        |
| GMM+PE                                                                           | 66.7±1.5           | 70.1±1.3        | 71.2±1.1        | 68.1±0.9                           | 75±2.0*         |
| GMM+CA                                                                           | 60±1.3             | 62±2.0          | 60±0.0          | 63.3±1.2                           | 69.3±0.8*       |
| GMM+YNB                                                                          | 70±1.2             | 65.5±0.7*       | 66.6±1.0*       | 66.7±1.0*                          | 0±0*            |
| GMM+Va                                                                           | 75±1.0             | 63.7±0.2*       | 63.5±2.0*       | 60%±1.5*                           | 0±0*            |
| GMM+(NH <sub>4</sub> ) <sub>2</sub> SO <sub>4</sub>                              | 30±1.0             | 33.3±2.0*       | 33.3±1.2*       | 33.3±1.2*                          | 50±2.0*         |
| GMM+(NH <sub>4</sub> ) <sub>2</sub> C <sub>4</sub> H <sub>4</sub> O <sub>6</sub> | 48.2±1.5           | 47±0.5          | 48.4±1.6        | 46±1.0                             | 48±1.2          |
| GMM+Gln                                                                          | 37.5±0.8           | 54.5±1.2*       | 54.8±1.0*       | 55±2.0*                            | 48.8±2.0*       |
| GMM+NH <sub>4</sub> NO <sub>3</sub>                                              | 28.8±1.5           | 27.3±1.3        | 25±2.0          | 26±2.0                             | 24.6±2.0        |
| GMM+NaNO <sub>3</sub>                                                            | 67.3±2.0           | 33.3±0.0*       | 35.5±0.8*       | 36±1.0*                            | 0±0*            |
| GMM+NaNO <sub>2</sub> 1mM                                                        | 61.5±0.0           | 46.8±1.0*       | 48±2.0*         | 48.8±0.8*                          | 0±0*            |
| GMM+NaNO <sub>2</sub> 5mM                                                        | 38.5±1.5           | 18.8±0.0*       | 16.6±1.2*       | 0±0*                               | 0±0*            |

Supplements, such as yeast extract (YE), peptone (PE), vitamins (VA), casamino acids (CA), yeast nitrogen base without amino acids (YN-AA), L-Glutamine (Gln) and other nitrogen sources, NH<sub>4</sub><sup>+</sup> or NO<sub>3</sub><sup>-</sup> were added into GMM with a same concentration in complete media (CM). The relative growth rate was [Utilization rate = (the diameter of treated strain) / (the diameter of strain in CM) x 100%]. NaNO<sub>2</sub> (1 mM and 5 mM, the wild type could not grow on 25 mM). The experiments were repeated three times. GMM [1% glucose minimal medium: 0.52 g/L KCl, 0.52 g/L MgSO<sub>4</sub>·7H<sub>2</sub>O, 1.52 g/L KH<sub>2</sub>PO<sub>4</sub>, 10 g/L glucose, 0.001% (W/V) thiamine and 0.1% (W/V) trace elements; containing 10 mM NH<sub>4</sub><sup>+</sup>]. Asterisks indicate a significant difference ( $p < 0.05$ ).
